# Supplementary material for: Biogeographic distributions of neotropical trees reflect their directly measured drought tolerances
Source: Sci Rep. 2017 Aug 21;7:8334. doi: 10.1038/s41598-017-08105-8 (PMC5567183; doi:10.1038/s41598-017-08105-8)
Supplement: Supplementary file 1 — Supplementary information [file 41598_2017_8105_MOESM1_ESM.pdf]

# Biogeographic distributions of neotropical trees reflect their directly measured drought tolerances

Adriane Esquivel-Muelbert<sup>1\*</sup>, David Galbraith<sup>1</sup>, Kyle G. Dexter<sup>2,3</sup>, Timothy R. Baker<sup>1</sup>, Simon L. Lewis<sup>1,4</sup>, Patrick Meir<sup>3,5</sup>, Lucy Rowland<sup>3,6</sup>, Antonio Carlos Lola da Costa<sup>7</sup>, Daniel Nepstad<sup>8</sup> & Oliver L. Phillips<sup>1</sup>

**1. School of Geography, University of Leeds, Leeds, LS2 9JT, UK**

**2. Royal Botanic Garden of Edinburgh, EH3 5LR, Edinburgh, UK**

**3. School of Geosciences, University of Edinburgh, Edinburgh, UK**

**4. Department of Geography, University College London, London, UK**

**5. Research School of Biology, Australian National University, Canberra, Australia.**

**6. Department of Geography, College of Life and Environmental Sciences, University of Exeter, Exeter, UK**

**7. Universidade Federal do Pará, Belém, Pará, Brazil**

**8. Earth Innovation Institute, San Francisco, CA, USA.**

\* [adriane.esquivel@gmail.com](mailto:adriane.esquivel@gmail.com)

**Supplementary Fig. S1.** Correlation between mortality rates in <sup>1</sup> and as calculated in this study. The x-axes show mortality rates (MR) as calculated by <sup>1</sup> and the y-axes represent mortality rates as calculated in this study. The left graph shows mortality rates at the drought period (1982-85) and the right graph mortality rates in the control period (1985 – 1990).

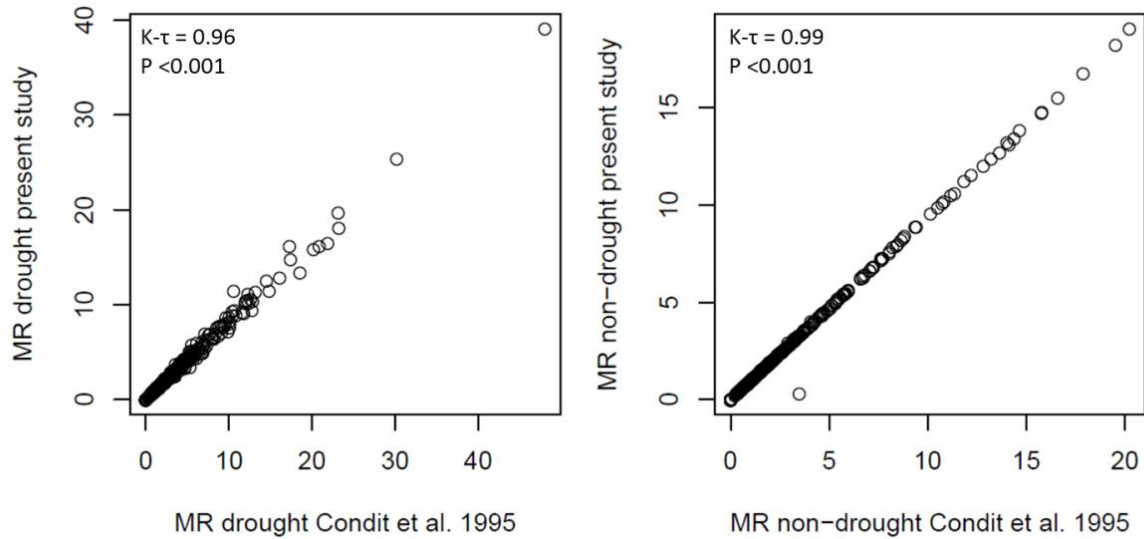

## **Supplementary methods S2. Accounting for the effect of sample size on the correlation between drought-induced mortality ( $\Delta m$ ) and water deficit affiliation (WDA).**

To assess the impact of (small) sample sizes of individual taxa on confounding our mortality rates estimates ( $\Delta m$ ) vs. WDA values, we performed a series of exploratory analyses using all available data from BCI, Caxiuanã and Tapajós. We calculated these correlations for different subsamples, varying the minimum number of stems per taxon required for the taxon to be included in each subsample (Figures S2.1 to S2.5). This gives information on how the number of stems observed per taxon and the number of taxa analysed in each study case can, together, affect the correlation statistics between drought tolerance and WDA for Tapajós, Caxiuanã and BCI.

When analysing the influence of the number of stems in the correlation, values of Kendall  $\tau$  tend to clearly increase as the analyses become progressively restricted to only the best sampled taxa (Figures S2.1 to S2.5). However, as the sample size in terms of number of taxa inevitably declines when these criteria are heightened, the P-values for evaluating the hypothesis of association between  $\Delta m$  and WDA tend to be minimal at intermediate numbers of taxa. This happens as a consequence of the statistical power available to test the hypothesis being maximal when the number of taxa with an adequate number of individuals to estimate mortality accurately is sufficient to test for the relationship between  $\Delta m$  and WDA. We use the subset that maximizes the correlation between  $\Delta m$  and WDA. Note that the direction of the relationship between  $\Delta m$  and WDA is consistently positive across the different subsets regardless of the sample size.

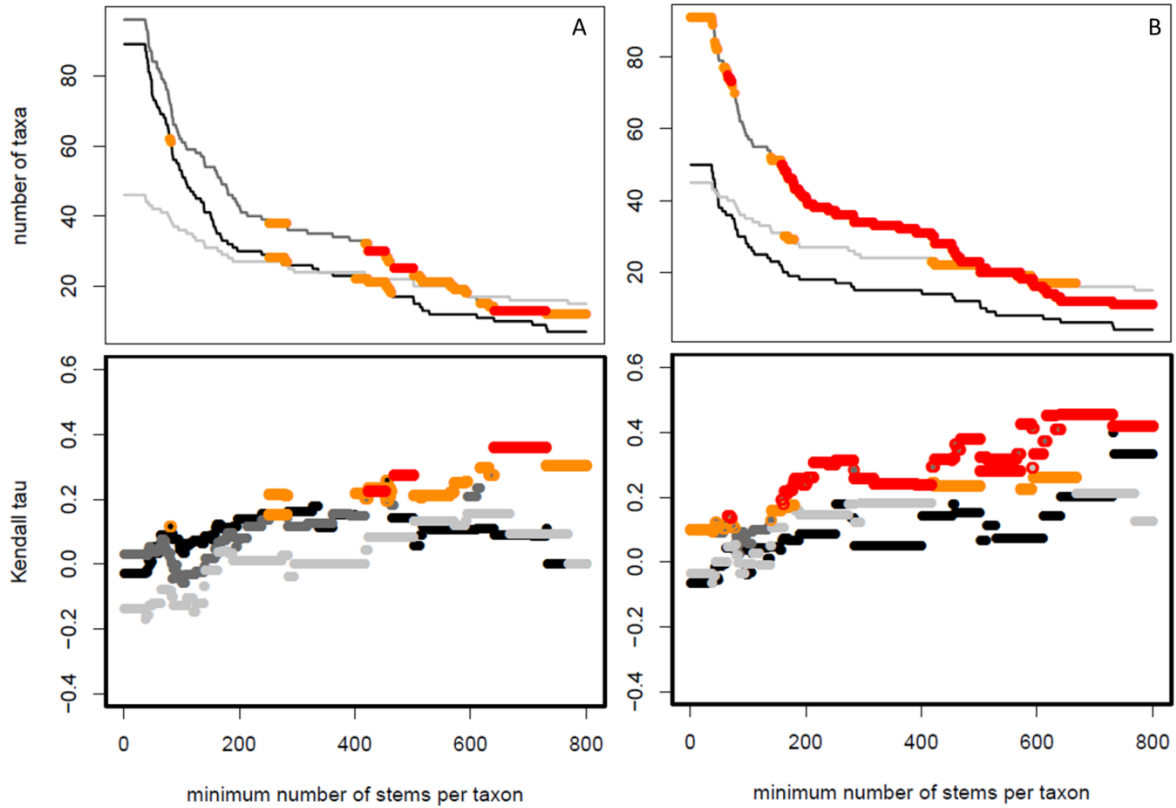

**Figure S2.1** – Influence of sample sizes on correlation between drought-induced mortality ( $\Delta m$ ) and water deficit affiliation (WDA) of trees  $> 100$  mm D as a consequence of the 1982-83 drought in BCI (Condit et al., 1995). Here we present values of Kendall's  $\tau$  coefficient of correlation between  $\Delta m$  and WDA and the P value of each correlation for various subsamples from the original data, differing in the minimum number of stems per taxa. The subsamples are ordered by the minimum number of stems per taxa, moving from 1 to 800, along each x-axis. The top graphs show the number of taxa within each subsample. The bottom graphs show values of Kendall's  $\tau$  coefficient of correlation between  $\Delta m$  and WDA for each subsample. Black dots represent analyses performed at the species, dark grey at the genus and light grey at the family level. The two graphs on the left show analyses including all taxa whilst the graphs on the right show results for excluding taxa affiliated to locally enhanced water supply areas. P values test the null hypothesis of no positive relationship between  $\Delta m$  and WDA, considering  $\alpha = 0.1$  (orange dots) and  $\alpha = 0.05$  (red dots).

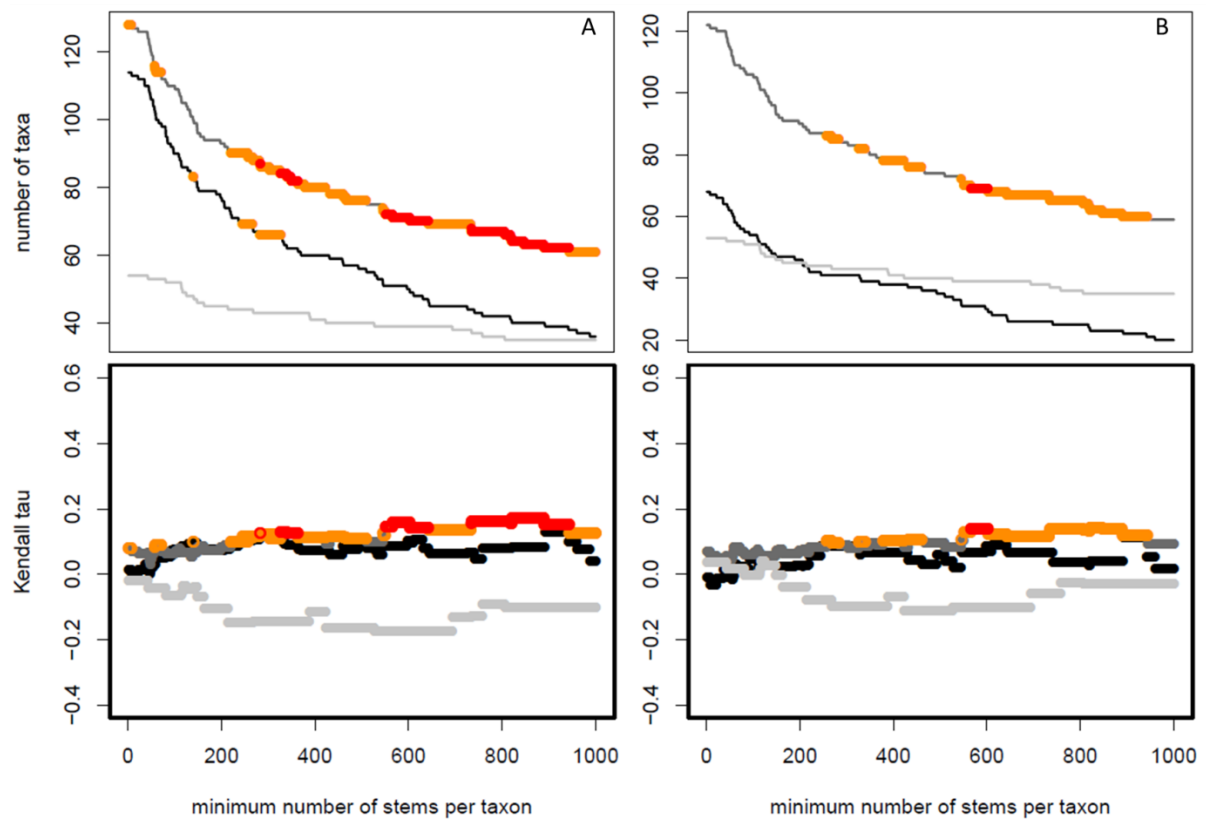

**Figure S2.2** – Influence of sample sizes on the correlation between drought-induced mortality ( $\Delta m$ ) and water deficit affiliation (WDA) of saplings 10 mm – 99 mm D as a consequence of the 1982-83 drought in BCI (Condit et al., 1995). Here we present values of Kendall's  $\tau$  coefficient of correlation between  $\Delta m$  and WDA and the P value of each correlation for various subsamples from the original data, differing in the minimum number of stems per taxa. The subsamples are ordered by the minimum number of stems per taxa, moving from 1 to 1000 along each x-axis. The top graphs show the number of taxa within each subsample. The bottom graphs show values of Kendall's  $\tau$  coefficient of correlation between  $\Delta m$  and WDA for each subsample. Black dots represent analyses performed at the species, dark grey at the genus and light grey at the family level. The two graphs on the left show analyses including all taxa whilst the graphs on the right show results for excluding taxa affiliated to locally enhanced water supply areas. P values test the null hypothesis of no positive relationship between  $\Delta m$  and WDA, considering  $\alpha = 0.1$  (orange dots) and  $\alpha = 0.05$  (red dots).

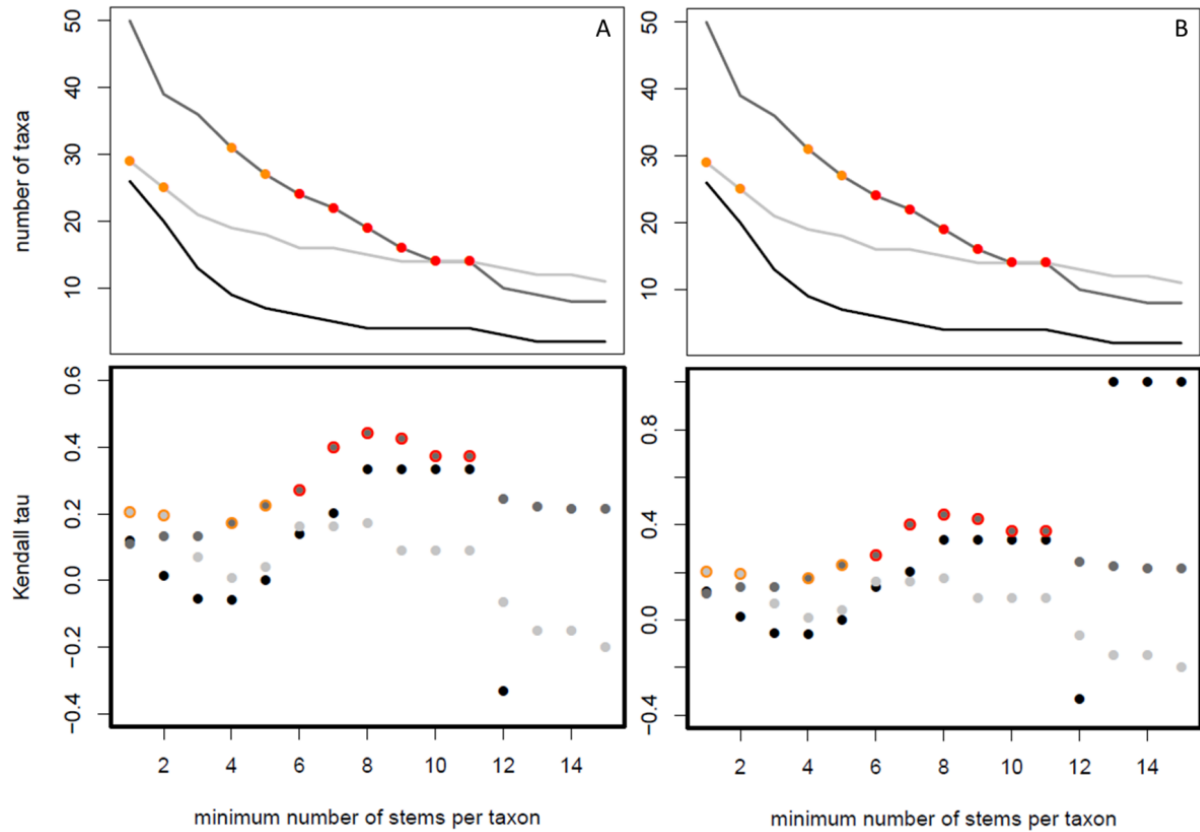

**Figure S2.3** Influence of sample sizes on correlation between drought-induced mortality effect ( $\Delta m$ ) and precipitation affiliation for trees > 100 mm D in the Tapajós drought experiment<sup>2</sup>. Here we present values of Kendall's  $\tau$  coefficient of correlation between  $\Delta m$  and WDA and the P value of each correlation for various subsamples from the original data differing in the minimum number of stems per taxa. The subsamples are ordered by the minimum number of stems per taxa, moving from 1 to 14 along each x-axis. The top graphs show the number of taxa within each subsample. The bottom graphs show values of Kendall's  $\tau$  coefficient of correlation between  $\Delta m$  and WDA for each subsample. Black dots represent analyses performed at the species, dark grey at the genus and light grey at the family level. The two graphs on the left show analyses including all taxa whilst the graphs on the right show results for excluding taxa affiliated to locally enhanced water supply areas. P values test the null hypothesis of no positive relationship between  $\Delta m$  and WDA, considering  $\alpha = 0.1$  (orange dots) and  $\alpha = 0.05$  (red dots).

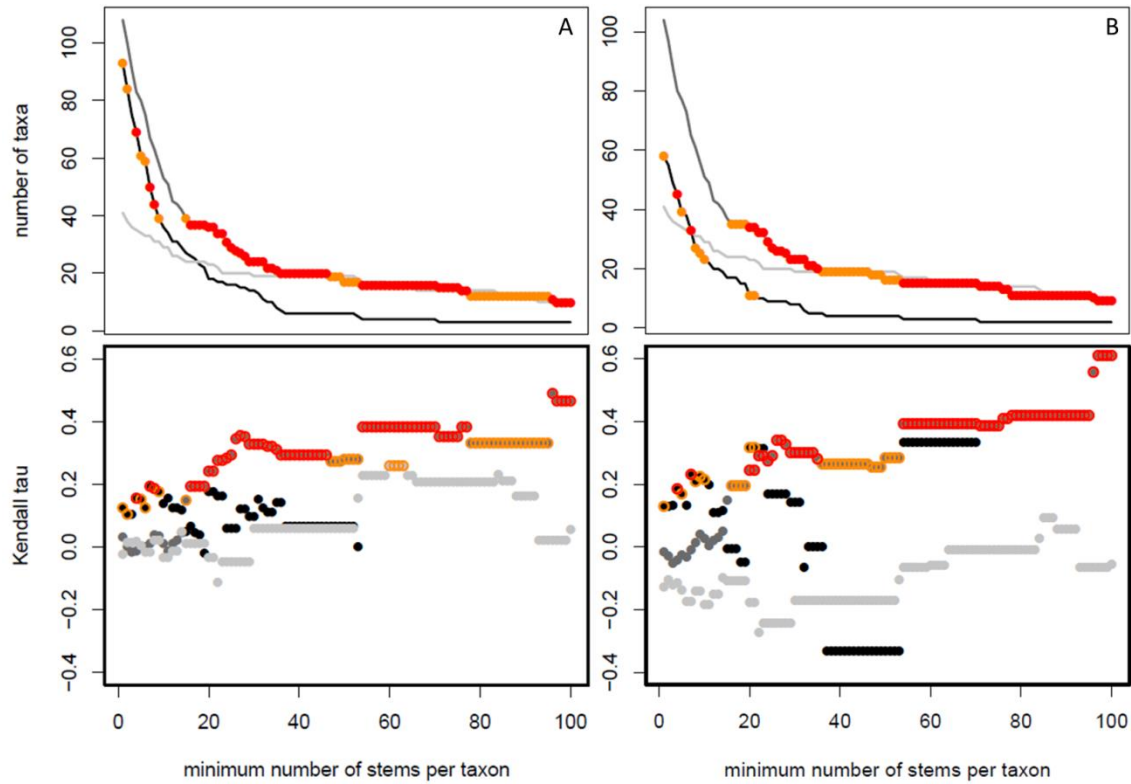

**Figure S2.4** Influence of sample sizes on correlation between drought-induced mortality effect ( $\Delta m$ ) and precipitation affiliation for saplings (20 – 99 mm D) in Tapajós drought experiment <sup>2</sup>. Here we present values of Kendall's  $\tau$  coefficient of correlation between  $\Delta m$  and WDA and the P value of each correlation for various subsamples from the original data differing in the minimum number of stems per taxa. The subsamples are ordered by the minimum number of stems per taxa, moving from 1 to 100 along each x-axis. The top graphs show the number of taxa within each subsample. The bottom graphs show values of Kendall's  $\tau$  coefficient of correlation between  $\Delta m$  and WDA for each subsample. Black dots represent analyses performed at the species, dark grey at the genus and light grey at the family level. The two graphs on the left show analyses including all taxa whilst the graphs on the right show results for excluding taxa affiliated to locally enhanced water supply areas. P values test the null hypothesis of no positive relationship between  $\Delta m$  and WDA, considering  $\alpha = 0.1$  (orange dots) and  $\alpha = 0.05$  (red dots).

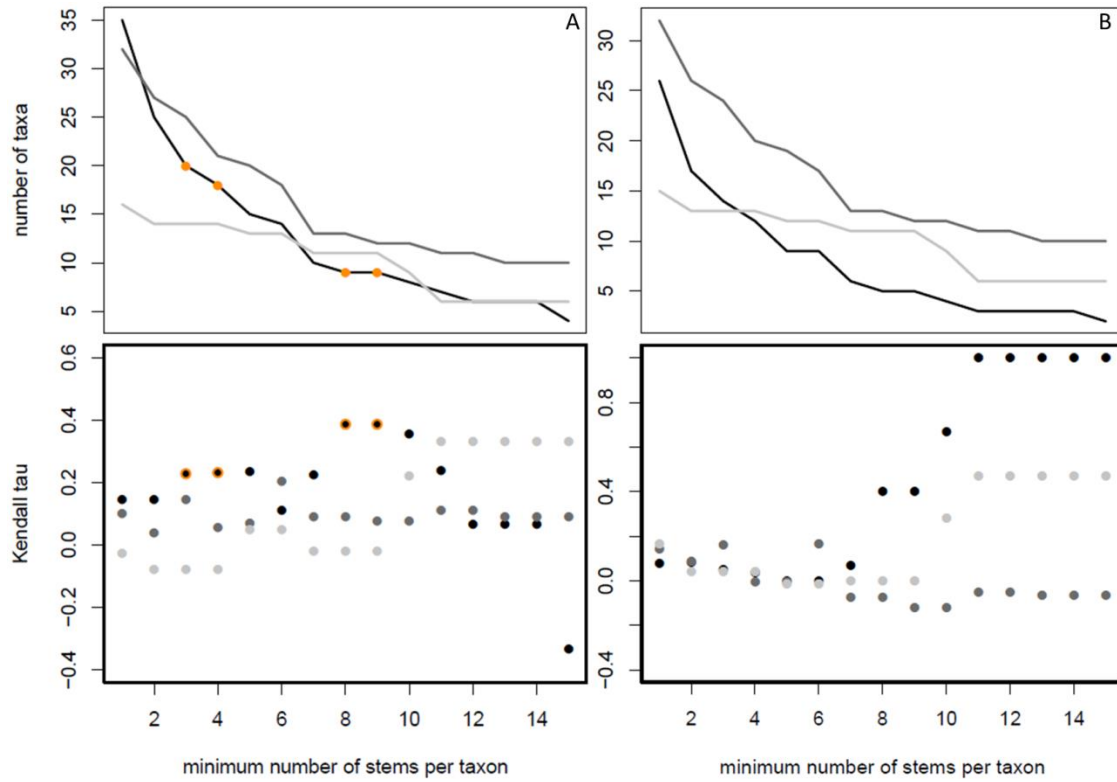

**Figure S2.5** - Influence of sample sizes on the correlation between drought-induced mortality effect ( $\Delta m$ ) and precipitation affiliation for trees (>10cm D) in the Caxiuanã drought experiment <sup>3</sup>. Here we present values of Kendall's  $\tau$  coefficient of correlation between  $\Delta m$  and WDA and the P value of each correlation for various subsamples from the original data differing in the minimum number of stems per taxa. The subsamples are ordered by the minimum number of stems per taxa, moving from 1 to 1000 along each x-axis. The top graphs show the number of taxa within each subsample. The bottom graphs show values of Kendall's  $\tau$  coefficient of correlation between  $\Delta m$  and WDA for each subsample. Black dots represent analyses performed at the species, dark grey at the genus and light grey at the family level. The two graphs on the left show analyses including all taxa whilst the graphs on the right show results for excluding taxa affiliated to locally enhanced water supply areas. P values test the null hypothesis of no positive relationship between  $\Delta m$  and WDA, considering  $\alpha = 0.1$  (orange dots) and  $\alpha = 0.05$  (red dots).

**Supplementary Table S3** Number and proportions of taxa from original studies analysed. Number of taxa in the original study represents the number of taxa occurring in both drought and control observations. The number of taxa from the original case studies that had information on WDA are shown also as a percentage of the number of taxa in the original study in brackets. Values are shown for all taxa and for a subset excluding taxa affiliated with areas of locally enhanced water supply (LEWS).

| Source                       | Taxonomic level | Number of taxa in original study | Number taxa with information on WDA |                               |
|------------------------------|-----------------|----------------------------------|-------------------------------------|-------------------------------|
|                              |                 |                                  | All taxa (%)                        | Excluding LEWS affiliated (%) |
| BCI trees                    | Species         | 132                              | 89 (67)                             | 50 (38)                       |
|                              | Genera          | 99                               | 96 (97)                             | 91 (92)                       |
|                              | Families        | 46                               | 46 (100)                            | 45 (98)                       |
| Tapajós trees                | Species         | 70                               | 40 (57)                             | 26 (37)                       |
|                              | Genera          | 53                               | 52 (98)                             | 50 (94)                       |
|                              | Families        | 29                               | 29(100)                             | 29 (100)                      |
| Caxiuanã                     | Species         | 63                               | 35 (55)                             | 26 (41)                       |
|                              | Genera          | 36                               | 32 (89)                             | 32 (89)                       |
|                              | Families        | 16                               | 16 (100)                            | 15 (94)                       |
| BCI saplings                 | Species         | 203                              | 116 (57)                            | 68 (33)                       |
|                              | Genera          | 143                              | 130 (90)                            | 124 (87)                      |
|                              | Families        | 54                               | 54 (100)                            | 53 (98)                       |
| Tapajós saplings             | Species         | 202                              | 100 (49)                            | 64 (32)                       |
|                              | Genera          | 119                              | 114 (96)                            | 110 (92)                      |
|                              | Families        | 43                               | 43 (100)                            | 43 (100)                      |
| Poorter & Markesteijn (2008) | Species         | 36                               | 30 (83)                             | 18 (50)                       |
|                              | Genera          | 31                               | 29 (93)                             | 26 (84)                       |
|                              | Families        | 18                               | 18(100)                             | 17(94)                        |
| Engelbrecht et al. (2007)    | Species         | 48                               | 29 (60)                             | 16 (33)                       |
|                              | Genera          | 45                               | 41 (91)                             | 40 (88)                       |
|                              | Families        | 29                               | 29(100)                             | 29(100)                       |

**Supplementary Table S4** Mortality rates at drought and control observations for trees and saplings in the different case studies calculated across individuals and at the genus-levels. Means were calculated considering the genera that occur in both, control and droughted areas. Values in brackets represent standard deviations. Mortality rates are calculated for BCI, the 1982-3 El Niño drought in Barro Colorado Island in Panama <sup>1</sup> and two through-fall exclusion experiments in the Brazilian Amazon, Tapajós <sup>2</sup> (TAP) and Caxiuanã <sup>3</sup> (CAX).

|                          |                  | $m_{control}$ | $m_{droughted}$ | $m_{droughted} / m_{control}$ | $\Delta(m_{droughted} - m_{control})$ |
|--------------------------|------------------|---------------|-----------------|-------------------------------|---------------------------------------|
| mean $m$ all individuals |                  |               |                 |                               |                                       |
| Trees                    | CAX              | 0.8           | 2.4             | 2.9                           | 1.6                                   |
|                          | TAP              | 1.9           | 5.3             | 2.8                           | 3.4                                   |
|                          | BCI              | 2.0           | 2.3             | 1.2                           | 0.3                                   |
| Saplings                 | TAP              | 1.9           | 2.2             | 1.8                           | 0.3                                   |
|                          | BCI              | 2.2           | 2.2             | 1                             | -0.1                                  |
| mean $m$ per genus       |                  |               |                 |                               |                                       |
| Trees                    | all observations | 4.8 (8)       | 7 (20)          | 3.2                           | 4.8                                   |
|                          | CAX              | 0.8 (2)       | 10.1 (27)       | 13.4                          | 9.4 (27)                              |
|                          | TAP              | 2.7 (14)      | 13.1 (29)       | 4.8                           | 10.4 (33)                             |
|                          | BCI              | 2.4 (3)       | 2.6 (2)         | 1                             | 0.1 (1)                               |
| Saplings                 | TAP              | 3.7 (16)      | 4.5 (16)        | 1.2                           | 0.8 (19)                              |
|                          | BCI              | 3.4 (4)       | 3.6 (4)         | 1.1                           | 0.2 (2)                               |

**Supplementary Table S5** Drought-induced mortality and water deficit affiliation (mm) data for all genera in different experiments and at different life history stages.

| Genus           | Drought-induced mortality | Water deficit affiliation (mm) | Experiment | Life-history stage |
|-----------------|---------------------------|--------------------------------|------------|--------------------|
| Alibertia       | 0.40                      | -397                           | Panama     | seedlings          |
| Anaxagorea      | 0.29                      | -39                            | Panama     | seedlings          |
| Andira          | 0.16                      | -134                           | Panama     | seedlings          |
| Beilschmiedia   | 0.22                      | -204                           | Panama     | seedlings          |
| Brosimum        | 0.62                      | -183                           | Panama     | seedlings          |
| Calophyllum     | 0.57                      | -146                           | Panama     | seedlings          |
| Capparidastrium | 0.00                      | -122                           | Panama     | seedlings          |
| Casearia        | 0.08                      | -177                           | Panama     | seedlings          |
| Cordia          | 0.29                      | -245                           | Panama     | seedlings          |
| Cupania         | 0.26                      | -297                           | Panama     | seedlings          |
| Dipteryx        | 0.00                      | -227                           | Panama     | seedlings          |
| Faramea         | 0.00                      | -258                           | Panama     | seedlings          |
| Garcinia        | 0.00                      | -139                           | Panama     | seedlings          |
| Guapira         | 0.00                      | -322                           | Panama     | seedlings          |
| Guarea          | 0.93                      | -123                           | Panama     | seedlings          |
| Hymenaea        | 0.23                      | -89                            | Panama     | seedlings          |
| Inga            | 0.26                      | -105                           | Panama     | seedlings          |
| Lacistema       | 0.78                      | -141                           | Panama     | seedlings          |
| Lacmellea       | 0.29                      | -49                            | Panama     | seedlings          |
| Licania         | 0.48                      | -52                            | Panama     | seedlings          |
| Mouriri         | 0.07                      | -62                            | Panama     | seedlings          |
| Myrcia          | 0.63                      | -147                           | Panama     | seedlings          |
| Ouratea         | 0.08                      | -152                           | Panama     | seedlings          |
| Picramnia       | 0.47                      | -105                           | Panama     | seedlings          |
| Piper           | 0.83                      | -197                           | Panama     | seedlings          |
| Posoqueria      | 0.08                      | -151                           | Panama     | seedlings          |
| Pouteria        | 0.45                      | -158                           | Panama     | seedlings          |
| Pseudobombax    | 0.19                      | -314                           | Panama     | seedlings          |
| Psychotria      | 0.07                      | -148                           | Panama     | seedlings          |
| Pterocarpus     | 0.56                      | -121                           | Panama     | seedlings          |
| Sorocea         | 0.78                      | -103                           | Panama     | seedlings          |
| Swartzia        | 0.00                      | -86                            | Panama     | seedlings          |
| Tabebuia        | 0.71                      | -337                           | Panama     | seedlings          |
| Tetragastris    | 0.34                      | -138                           | Panama     | seedlings          |
| Trichilia       | 0.48                      | -196                           | Panama     | seedlings          |
| Unonopsis       | 0.89                      | -38                            | Panama     | seedlings          |
| Virola          | 0.77                      | -67                            | Panama     | seedlings          |
| Vochysia        | 0.65                      | -197                           | Panama     | seedlings          |
| Xylopia         | 0.91                      | -245                           | Panama     | seedlings          |
| Xylosma         | 0.41                      | -205                           | Panama     | seedlings          |

**Cont. Table S5**

| <b>Genus</b>    | <b>Drought-induced mortality</b> | <b>Water deficit affiliation (mm)</b> | <b>Experiment</b> | <b>Life-history stage</b> |
|-----------------|----------------------------------|---------------------------------------|-------------------|---------------------------|
| Alseis          | 0.00                             | -184                                  | BCI               | trees                     |
| Cordia          | 0.00                             | -245                                  | BCI               | trees                     |
| Faramea         | 0.00                             | -258                                  | BCI               | trees                     |
| Guarea          | 0.00                             | -123                                  | BCI               | trees                     |
| Gustavia        | 0.00                             | -31                                   | BCI               | trees                     |
| Hirtella        | 0.00                             | -190                                  | BCI               | trees                     |
| Oenocarpus      | 0.00                             | -108                                  | BCI               | trees                     |
| Protium         | 0.01                             | -151                                  | BCI               | trees                     |
| Quararibea      | 0.01                             | -146                                  | BCI               | trees                     |
| Socratea        | 0.00                             | -201                                  | BCI               | trees                     |
| Trichilia       | 0.00                             | -196                                  | BCI               | trees                     |
| Virola          | 0.01                             | -67                                   | BCI               | trees                     |
| Acalypha        | 0.00                             | -110                                  | BCI               | saplings                  |
| Alibertia       | 0.00                             | -397                                  | BCI               | saplings                  |
| Alseis          | 0.00                             | -184                                  | BCI               | saplings                  |
| Anaxagorea      | 0.02                             | -39                                   | BCI               | saplings                  |
| Annona          | 0.01                             | -235                                  | BCI               | saplings                  |
| Aspidosperma    | 0.00                             | -234                                  | BCI               | saplings                  |
| Beilschmiedia   | 0.00                             | -204                                  | BCI               | saplings                  |
| Brosimum        | 0.00                             | -183                                  | BCI               | saplings                  |
| Calophyllum     | 0.00                             | -146                                  | BCI               | saplings                  |
| Capparidastrium | 0.00                             | -122                                  | BCI               | saplings                  |
| Casearia        | 0.01                             | -177                                  | BCI               | saplings                  |
| Cassipourea     | 0.00                             | -169                                  | BCI               | saplings                  |
| Chrysochlamys   | 0.00                             | -38                                   | BCI               | saplings                  |
| Chrysophyllum   | 0.00                             | -131                                  | BCI               | saplings                  |
| Coccoloba       | 0.00                             | -213                                  | BCI               | saplings                  |
| Cordia          | 0.00                             | -245                                  | BCI               | saplings                  |
| Coussarea       | 0.00                             | -90                                   | BCI               | saplings                  |
| Croton          | -0.02                            | -179                                  | BCI               | saplings                  |
| Cupania         | 0.00                             | -297                                  | BCI               | saplings                  |
| Drypetes        | 0.00                             | -179                                  | BCI               | saplings                  |
| Erythroxylum    | 0.00                             | -221                                  | BCI               | saplings                  |
| Eugenia         | 0.00                             | -122                                  | BCI               | saplings                  |
| Faramea         | 0.00                             | -258                                  | BCI               | saplings                  |
| Garcinia        | -0.01                            | -139                                  | BCI               | saplings                  |
| Guarea          | 0.00                             | -123                                  | BCI               | saplings                  |
| Guatteria       | 0.00                             | -76                                   | BCI               | saplings                  |
| Guettarda       | -0.01                            | -290                                  | BCI               | saplings                  |
| Heisteria       | 0.00                             | -204                                  | BCI               | saplings                  |
| Hirtella        | 0.00                             | -190                                  | BCI               | saplings                  |
| Inga            | 0.00                             | -105                                  | BCI               | saplings                  |

**Cont. Table S5**

| <b>Genus</b>    | <b>Drought-induced mortality</b> | <b>Water deficit affiliation (mm)</b> | <b>Experiment</b> | <b>Life-history stage</b> |
|-----------------|----------------------------------|---------------------------------------|-------------------|---------------------------|
| Lacistema       | 0.00                             | -141                                  | BCI               | saplings                  |
| Laetia          | -0.01                            | -222                                  | BCI               | saplings                  |
| Licania         | 0.00                             | -52                                   | BCI               | saplings                  |
| Lonchocarpus    | 0.00                             | -276                                  | BCI               | saplings                  |
| Maquira         | 0.00                             | -83                                   | BCI               | saplings                  |
| Miconia         | -0.02                            | -155                                  | BCI               | saplings                  |
| Mouriri         | -0.01                            | -62                                   | BCI               | saplings                  |
| Nectandra       | 0.02                             | -193                                  | BCI               | saplings                  |
| Ocotea          | 0.01                             | -270                                  | BCI               | saplings                  |
| Oenocarpus      | 0.01                             | -108                                  | BCI               | saplings                  |
| Ouratea         | 0.00                             | -152                                  | BCI               | saplings                  |
| Palicourea      | -0.03                            | -251                                  | BCI               | saplings                  |
| Pentagonia      | 0.01                             | -3                                    | BCI               | saplings                  |
| Picramnia       | 0.00                             | -105                                  | BCI               | saplings                  |
| Piper           | -0.03                            | -197                                  | BCI               | saplings                  |
| Pouteria        | 0.00                             | -158                                  | BCI               | saplings                  |
| Protium         | 0.00                             | -151                                  | BCI               | saplings                  |
| Psychotria      | -0.01                            | -148                                  | BCI               | saplings                  |
| Pterocarpus     | 0.00                             | -121                                  | BCI               | saplings                  |
| Quararibea      | 0.00                             | -146                                  | BCI               | saplings                  |
| Randia          | 0.00                             | -268                                  | BCI               | saplings                  |
| Rinorea         | 0.00                             | -32                                   | BCI               | saplings                  |
| Simarouba       | -0.01                            | -206                                  | BCI               | saplings                  |
| Siparuna        | 0.02                             | -170                                  | BCI               | saplings                  |
| Sloanea         | 0.00                             | -171                                  | BCI               | saplings                  |
| Socratea        | -0.01                            | -201                                  | BCI               | saplings                  |
| Sorocea         | 0.00                             | -103                                  | BCI               | saplings                  |
| Stylogyne       | 0.00                             | -147                                  | BCI               | saplings                  |
| Swartzia        | 0.00                             | -86                                   | BCI               | saplings                  |
| Tabernaemontana | 0.00                             | -262                                  | BCI               | saplings                  |
| Tachigali       | -0.01                            | -193                                  | BCI               | saplings                  |
| Talisia         | 0.00                             | -257                                  | BCI               | saplings                  |
| Tetragastris    | 0.00                             | -138                                  | BCI               | saplings                  |
| Trichilia       | 0.00                             | -196                                  | BCI               | saplings                  |
| Trophis         | 0.00                             | -252                                  | BCI               | saplings                  |
| Unonopsis       | 0.00                             | -38                                   | BCI               | saplings                  |
| Virola          | 0.00                             | -67                                   | BCI               | saplings                  |
| Xylopia         | 0.00                             | -245                                  | BCI               | saplings                  |
| Zanthoxylum     | -0.02                            | -271                                  | BCI               | saplings                  |
| Aparisthium     | 0.98                             | -35                                   | Tapajós           | trees                     |
| Brosimum        | 0.00                             | -183                                  | Tapajós           | trees                     |
| Cordia          | -0.04                            | -245                                  | Tapajós           | trees                     |
| Couratari       | -0.04                            | -208                                  | Tapajós           | trees                     |

**Cont. Table S5**

| <b>Genus</b>  | <b>Drought-induced mortality</b> | <b>Water deficit affiliation (mm)</b> | <b>Experiment</b> | <b>Life-history stage</b> |
|---------------|----------------------------------|---------------------------------------|-------------------|---------------------------|
| Coussarea     | 0.01                             | -90                                   | Tapajós           | trees                     |
| Erisma        | 0.05                             | -104                                  | Tapajós           | trees                     |
| Eschweilera   | 0.02                             | -47                                   | Tapajós           | trees                     |
| Inga          | 0.19                             | -105                                  | Tapajós           | trees                     |
| Iryanthera    | 0.15                             | -101                                  | Tapajós           | trees                     |
| Lecythis      | 0.00                             | -55                                   | Tapajós           | trees                     |
| Licania       | 1.00                             | -52                                   | Tapajós           | trees                     |
| Licaria       | 0.13                             | -140                                  | Tapajós           | trees                     |
| Miconia       | -0.01                            | -155                                  | Tapajós           | trees                     |
| Myrciaria     | 0.00                             | -320                                  | Tapajós           | trees                     |
| Pouteria      | 0.02                             | -158                                  | Tapajós           | trees                     |
| Protium       | -0.01                            | -151                                  | Tapajós           | trees                     |
| Tachigali     | 0.04                             | -193                                  | Tapajós           | trees                     |
| Virola        | 0.00                             | -67                                   | Tapajós           | trees                     |
| Zygia         | 0.28                             | -25                                   | Tapajós           | trees                     |
| Amphiodon     | 0.00                             | -80                                   | Tapajós           | saplings                  |
| Aparisthmium  | 0.01                             | -35                                   | Tapajós           | saplings                  |
| Coussarea     | 0.01                             | -90                                   | Tapajós           | saplings                  |
| Faramea       | -0.03                            | -258                                  | Tapajós           | saplings                  |
| Inga          | 0.03                             | -105                                  | Tapajós           | saplings                  |
| Protium       | 0.01                             | -151                                  | Tapajós           | saplings                  |
| Rinorea       | 0.03                             | -32                                   | Tapajós           | saplings                  |
| Tachigali     | 0.00                             | -193                                  | Tapajós           | saplings                  |
| Talisia       | 0.00                             | -257                                  | Tapajós           | saplings                  |
| Acacia        | 0.16                             | -284                                  | Bolivia           | seedlings                 |
| Alibertia     | 0.14                             | -397                                  | Bolivia           | seedlings                 |
| Amburana      | 0.02                             | -469                                  | Bolivia           | seedlings                 |
| Anadenanthera | 0.15                             | -575                                  | Bolivia           | seedlings                 |
| Aspidosperma  | 0.16                             | -234                                  | Bolivia           | seedlings                 |
| Batocarpus    | 0.18                             | -58                                   | Bolivia           | seedlings                 |
| Cariniana     | 0.16                             | -258                                  | Bolivia           | seedlings                 |
| Cedrela       | 0.15                             | -354                                  | Bolivia           | seedlings                 |
| Ceiba         | 0.03                             | -383                                  | Bolivia           | seedlings                 |
| Geissanthus   | 0.18                             | -602                                  | Bolivia           | seedlings                 |
| Hymenaea      | 0.28                             | -89                                   | Bolivia           | seedlings                 |
| Licaria       | 0.25                             | -140                                  | Bolivia           | seedlings                 |
| Margaritaria  | 0.20                             | -189                                  | Bolivia           | seedlings                 |
| Myracrodruon  | 0.17                             | -586                                  | Bolivia           | seedlings                 |
| Myrciaria     | 0.18                             | -320                                  | Bolivia           | seedlings                 |
| Platymiscium  | 0.14                             | -222                                  | Bolivia           | seedlings                 |
| Pseudobombax  | 0.03                             | -314                                  | Bolivia           | seedlings                 |
| Pseudolmedia  | 0.21                             | -216                                  | Bolivia           | seedlings                 |
| Sapindus      | 0.16                             | -507                                  | Bolivia           | seedlings                 |

**Cont. Table S5**

| <b>Genus</b>  | <b>Drought-induced mortality</b> | <b>Water deficit affiliation (mm)</b> | <b>Experiment</b> | <b>Life-history stage</b> |
|---------------|----------------------------------|---------------------------------------|-------------------|---------------------------|
| Sapium        | 0.18                             | -297                                  | Bolivia           | seedlings                 |
| Spondias      | 0.03                             | -264                                  | Bolivia           | seedlings                 |
| Sweetia       | 0.16                             | -616                                  | Bolivia           | seedlings                 |
| Swietenia     | 0.25                             | -282                                  | Bolivia           | seedlings                 |
| Tabebuia      | 0.16                             | -337                                  | Bolivia           | seedlings                 |
| Trema         | 0.25                             | -242                                  | Bolivia           | seedlings                 |
| Triplaris     | 0.37                             | -187                                  | Bolivia           | seedlings                 |
| Aspidosperma  | 0.00                             | -234                                  | Caxiuanã          | trees                     |
| Chrysophyllum | 0.03                             | -131                                  | Caxiuanã          | trees                     |
| Duguetia      | -0.04                            | -191                                  | Caxiuanã          | trees                     |
| Eschweilera   | 0.03                             | -47                                   | Caxiuanã          | trees                     |
| Inga          | 0.03                             | -105                                  | Caxiuanã          | trees                     |
| Lecythis      | 0.01                             | -55                                   | Caxiuanã          | trees                     |
| Licania       | 0.01                             | -52                                   | Caxiuanã          | trees                     |
| Manilkara     | 0.02                             | -255                                  | Caxiuanã          | trees                     |
| Micropholis   | 0.05                             | -93                                   | Caxiuanã          | trees                     |
| Minquartia    | -0.04                            | -31                                   | Caxiuanã          | trees                     |
| Ouratea       | 0.04                             | -152                                  | Caxiuanã          | trees                     |
| Pouteria      | 0.01                             | -158                                  | Caxiuanã          | trees                     |
| Protium       | 0.02                             | -151                                  | Caxiuanã          | trees                     |
| Stachyarrhena | 0.02                             | -4                                    | Caxiuanã          | trees                     |
| Swartzia      | 0.01                             | -86                                   | Caxiuanã          | trees                     |
| Tetragastris  | -0.03                            | -138                                  | Caxiuanã          | trees                     |
| Zygia         | 0.04                             | -25                                   | Caxiuanã          | trees                     |

**Supplementary Table S6** One and two-tailed P-values for the relationship between drought mortality ( $\Delta m$ ) and water deficit affiliation (WDA) in five droughted locations in the Neotropics. Kendall's  $\tau$  coefficient of correlation ( $K\tau$ ) between  $\Delta m$  and WDA were calculated for the 1982-3 El Niño drought in BCI <sup>1</sup>, two through-fall exclusion experiments in the Brazilian Amazon, Tapajós <sup>2</sup> and Caxiuanã <sup>3</sup>, and two seedling experiments, one in Panama <sup>4</sup> the other in Bolivia <sup>5</sup>. For BCI, Tapajós and Caxiuanã the relationship  $\Delta m$  vs. WDA was calculated for the subset (Number of genera) that maximizes detectability, including only taxa with the minimum number of stems (Min. number of stem per taxa) needed to permit estimation of mortality for that experiment (see Supplementary methods S2 for details). The minimum number of stems per taxa varied depending on the duration of the drought.

| Source   | Life stage | $K\tau$ | 1-sided<br>P-value | 2-sided<br>P-value | Number<br>of genera | Min. number of<br>stems per taxa |
|----------|------------|---------|--------------------|--------------------|---------------------|----------------------------------|
| BCI      | trees      | 0.42    | 0.02               | 0.04               | 12                  | 730                              |
|          | saplings   | 0.13    | 0.04               | 0.09               | 74                  | 602                              |
| Tapajós  | trees      | 0.44    | 0.004              | 0.009              | 19                  | 8                                |
|          | saplings   | 0.61    | 0.01               | 0.02               | 9                   | 100                              |
| Caxiuanã | trees      | 0.16    | 0.18               | 0.36               | 6                   | 17                               |
| Panama   | seedlings  | 0.05    | 0.32               | 0.65               | 40                  | 53                               |
| Bolivia  | seedlings  | 0.32    | 0.01               | 0.02               | 31                  | 40                               |

Note that the overall results are not affected when using 2-sided P-values. The only case where results change from being significant to marginally significant was for BCI saplings.

### Supplementary Fig. S7

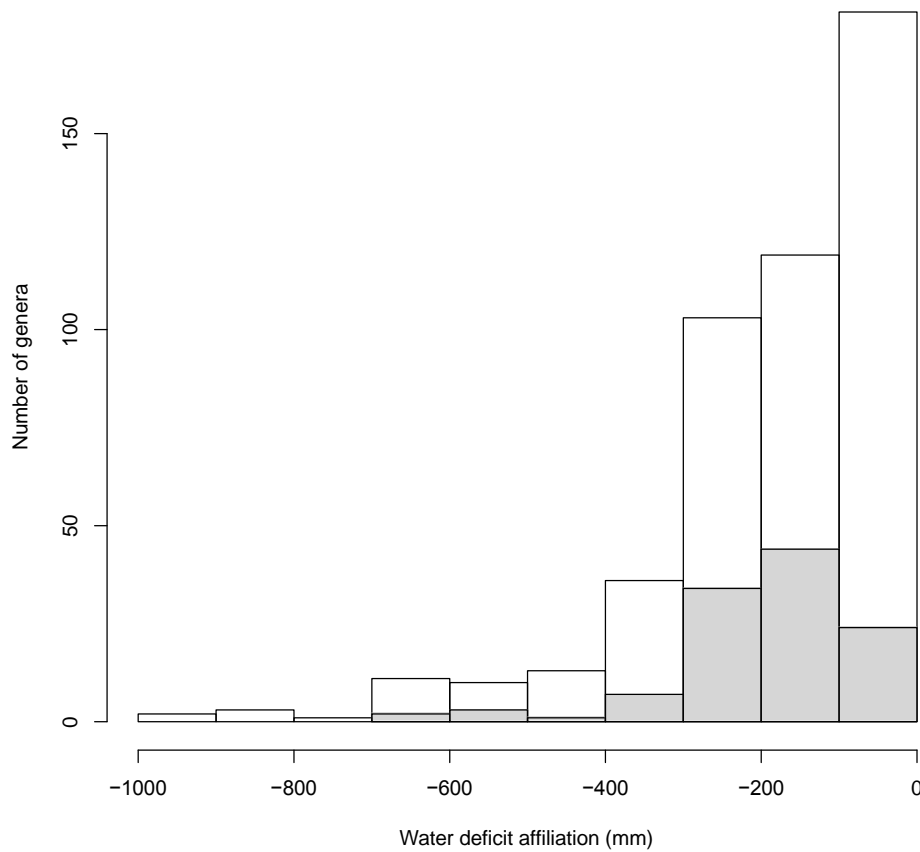

**Fig. S7** - Histogram comparing water deficit affiliation of 115 genera in our analyses (grey) with most Amazonian genera (white)<sup>6</sup>. Note that while most genera are affiliated to aseasonal conditions (WDA between 0 and -100 mm y<sup>-1</sup>) the majority of genera in drought-experiments are affiliated to seasonal climate (WDA between -100 and -300 mm y<sup>-1</sup>).

## References

- 1 Condit, R., Hubbell, S. P. & Foster, R. B. Mortality-rates of 205 neotropical tree and shrub species and the impact of a severe drought. *Ecological Monographs* **65**, 419-439, doi:10.2307/2963497 (1995).
- 2 Nepstad, D. C., Tohver, I. M., Ray, D., Moutinho, P. & Cardinot, G. Mortality of large trees and lianas following experimental drought in an amazon forest. *Ecology* **88**, 2259-2269, doi:10.1890/06-1046.1 (2007).
- 3 da Costa, A. C. L. *et al.* Effect of 7 yr of experimental drought on vegetation dynamics and biomass storage of an eastern Amazonian rainforest. *New Phytol.* **187**, 579-591, doi:10.1111/j.1469-8137.2010.03309.x (2010).
- 4 Engelbrecht, B. M. J. *et al.* Drought sensitivity shapes species distribution patterns in tropical forests. *Nature* **447**, 80-U82, doi:10.1038/nature05747 (2007).
- 5 Poorter, L. & Markesteijn, L. Seedling traits determine drought tolerance of tropical tree species. *Biotropica* **40**, 321-331, doi:10.1111/j.1744-7429.2007.00380.x (2008).
- 6 Esquivel-Muelbert, A. *et al.* Seasonal drought limits tree species across the Neotropics. *Ecography* **40**, 618-629, doi:10.1111/ecog.01904 (2017).
